# Supplementary material for: Remote template effect in the synthesis of bipyridine-strapped porphyrins
Source: Royal Society of Chemistry journal article supplement (doi:10.1039/d3cc01697h), 2023-01-01
Supplement: d3cc01697h1.pdf [file d3cc01697h1.pdf]

## Remote template effect in the synthesis of bipyridine-strapped porphyrins

Mathilde Berthe, Yoshiyuki Kagawa, Axel Riquet, Takashi Hayashi, Jean Weiss and Jennifer A. Wytko

### Content

---

Experimental methods and procedures

S2-S4

**Figures S1 – S16:**  $^1\text{H}$  and  $^{13}\text{C}$  NMR and MS spectra of compounds **3**, **2**, [**2Zn**] and **5**

S5-S12

**Figure S17.** Relevant distances and angles of solvent molecules observed within the strap of **5** in its crystal structure.

S13

**Figure S18.** MALDI-TOF mass spectrum of the crude mixture of the copper(I)-templated synthesis of **2**.

S13

**Figure S19-20.** UV-visible spectra of **2** before and after addition of  $\text{Zn}(\text{OAc})_2 \cdot 2\text{H}_2\text{O}$  and TFA.

S14

**Figure S21-23.** UV-visible spectra of **2**, [**2Zn**] and **5**.

S15

**Table S1.** Comparison of UV-visible data of bipyridine-strapped porphyrins **2**, **5** and [**2Zn**] with those of the phenanthroline-strapped porphyrins **1** and [**1Zn**].

S16

**Figure S24.** Fluorescence spectra of **1**, **2**, [**2Zn**] and **5**.

S16

**Table S2.** Comparison of emission wavelengths of **1**, **2**, **5**, [**1Zn**] and [**2Zn**].

S16

## Experimental Methods

**General.** 4'-Bromo-[1,1'-biphenyl]-2-carbaldehyde (**4**)<sup>S1</sup> and dipyrromethane<sup>S2</sup> were prepared according to literature procedures. 6,6'-Dibromo-2,2'-bipyridine (95%) was purchased from ABCR (Karlsruhe, Germany). Dichloromethane stabilized with ~0.2% EtOH was purchased from Carlo Erba (Val de Reuil, France) and used as received. All other reagents were purchased from Sigma Aldrich or Fischer Scientific and were used as received. Column chromatography was performed with silica gel from Merck (Kieselgel 60; 63-200  $\mu\text{m}$  or 40-63  $\mu\text{m}$ ) or alumina (Merck aluminum oxide 60 standardized). <sup>1</sup>H NMR spectra were recorded on Bruker Advance 300 (300 MHz), 400 (400 MHz) or 500 (500 MHz) spectrometers. Chemical shifts are given in ppm and were determined by taking the solvent as a reference. All coupling constants are in Hz. Mass spectrometry was performed on a Bruker Daltonics microTOF spectrometer (Bruker Daltonik GmbH, Bremen, Germany) by the Service de Spectrométrie de Masse de la Fédération de Chimie "Le Bel" (FR 2010).

**X-ray crystallography.** The crystals were placed in oil, and a single crystal was selected, mounted on a glass fibre and placed in a low-temperature N<sub>2</sub> stream.

For compounds [**2Zn**] and **3**, X-Ray diffraction data collection was carried out on a Bruker PHOTON-III DUO CPAD diffractometer equipped with an Oxford Cryosystem liquid N<sub>2</sub> device, using Mo-K $\alpha$  radiation ( $\lambda = 0.71073 \text{ \AA}$ ). The crystal-detector distance was 37 mm. The cell parameters were determined (APEX3 software)<sup>S3</sup> from reflections taken from one set of 180 frames, each at 1s exposure. The structures were solved using the program SHELXT-2014.<sup>S4</sup> The refinement and all further calculations were carried out using SHELXL-2014.<sup>S5</sup> The H-atoms were included in calculated positions and treated as riding atoms using SHELXL default parameters. The non-H atoms were refined anisotropically, using weighted full-matrix least-squares on F<sup>2</sup>. A semi-empirical absorption correction was applied using SADABS in APEX3;<sup>S3</sup> transmission factors:  $T_{\text{min}}/T_{\text{max}} = 0.7215/0.7458$ ;  $T_{\text{min}}/T_{\text{max}} = 0.6692/0.7456$ ; respectively for [**2Zn**] and **3**. For **3**, the structure was refined as a two-component twin with the twin law -1 0 0 0 -1 0 0.99 0 1 and a BASF of 0.04485.

For compounds **2** and **5**, X-ray diffraction data collection was carried out on a Bruker PHOTON-III DUO CPAD diffractometer equipped with an Oxford Cryosystem liquid N<sub>2</sub> device, using Cu-K $\alpha$  radiation ( $\lambda = 1.54178 \text{ \AA}$ ). The crystal-detector distance was 40 mm. The cell parameters were determined (APEX3 software<sup>S3</sup> for **1** and APEX4 software<sup>S6</sup> for **5**) from reflections taken from one set of 180 frames, each at 1s exposure. The structure was solved using the program SHELXT-2014.<sup>S4</sup> The refinement and all further calculations were carried out using SHELXL-2014.<sup>S5</sup> The hydrogen atoms of the NH group were located from Fourier difference. The other H-atoms were included in calculated positions and treated as riding atoms using SHELXL default parameters. The non-H atoms were refined anisotropically, using weighted full-matrix least-squares on F<sup>2</sup>. A semi-empirical absorption correction was applied using SADABS in APEX3<sup>S3</sup> for **2** and APEX4<sup>S6</sup> for **5**; transmission factors:  $T_{\text{min}}/T_{\text{max}} = 0.6227/0.7528$ ;  $T_{\text{min}}/T_{\text{max}} = 0.4011/0.7528$ ; respectively for **2** and **5**. For **2**, the methylenes C56, C57, C59 and C60 of the cyclohexane solvent are disordered over two positions with an occupancy ratio of 0.80/0.20. For **5**, the SQUEEZE instruction in PLATON<sup>S7</sup> was applied. The residual electron density was assigned to one molecule of the dichloromethane solvent.

<sup>S1</sup> L. A. Fontana, M. P. Almeida, A. F. P. Alcântara, V. H. Rigolin, M. A. Ribeiro, W. P. Barros, J. Megiatto. *ChemRxiv* **2020**. DOI: 10.26434/chemrxiv.12625772.v1

<sup>S2</sup> a) P. S. Clezy, G. A. Smythe, *Aust. J. Chem.* 1969, **22**, 239-249; b) R. Chong, P. S. Clezy, A. J. Liepa, A. W. Nichol, *Aust. J. Chem.* 1969, **22**, 229-238.

<sup>S3</sup> "M86-EXX229V1 APEX3 User Manual", Bruker AXS Inc., Madison, USA, 2016.

<sup>S4</sup> G. M. Sheldrick, *Acta Cryst.* 2015, A71, 3-8.

<sup>S5</sup> G. M. Sheldrick, *Acta Cryst.* 2015, C71, 3-8.

<sup>S6</sup> "M86-EXX278V1 APEX4 User Manual," Bruker Corporation, 2021.

<sup>S7</sup> A. L. Spek, *J. Appl. Cryst.* 2003, **36**, 7-13

## Experimental procedures

**4',4'''-([2,2'-Bipyridine]-6,6'-diyl)bis((1,1'-biphenyl)-2-carbaldehyde) (3).** To a degassed mixture of compound **4** (1.13 g, 3.36 mmol) and 6,6'-dibromo-2,2'-bipyridine (550 mg, 1.75 mmol) in 2 M Na<sub>2</sub>CO<sub>3</sub> aq. (1 mL) and 1,4-dioxane (5 mL), Pd(dppf)Cl<sub>2</sub> (26 mg, 0.035 mmol) was added. The mixture was stirred at 90 °C for 20 h. After cooling to room temperature, the mixture was extracted with CH<sub>2</sub>Cl<sub>2</sub> and the organic layer was dried over MgSO<sub>4</sub>. After removal of solvent under reduced pressure, the residue was filtered through a SiO<sub>2</sub> column (CH<sub>2</sub>Cl<sub>2</sub>) and recrystallized from CH<sub>2</sub>Cl<sub>2</sub>/Et<sub>2</sub>O to yield compound **3** (832 mg, 1.61 mmol, 92%) as a white powder. mp (from CH<sub>2</sub>Cl<sub>2</sub>/Et<sub>2</sub>O). <sup>1</sup>H NMR δH(300 MHz; CDCl<sub>3</sub>) 10.10 (2 H, d, J = 0.7, H<sub>CHO</sub>), 8.67 (2 H, dd, J = 7.8, 0.8, H<sub>3</sub>), 8.30 (4 H, dt, J = 8.4, 1.8, H<sub>0</sub>), 8.08 (2 H, dd, J = 8.3, 1.6, H<sub>9</sub>), 7.99 (2 H, t, J = 7.8, H<sub>4</sub>), 7.88 (2 H, dd, J = 7.8, 0.8, H<sub>5</sub>), 7.72–7.67 (2 H, m, H<sub>7</sub>), 7.58–7.52 (8 H, m, H<sub>m,6,8</sub>). <sup>13</sup>C NMR δH(100 MHz, CDCl<sub>3</sub>) 192.4, 156.0, 155.6, 145.5, 139.3, 138.4, 137.9, 133.9, 133.7, 130.8, 130.6, 128.0, 127.8, 127.1, 120.5, 119.9. ESI HRMS: *m/z* = 517.1909 ([M+H]<sup>+</sup>, 100%)

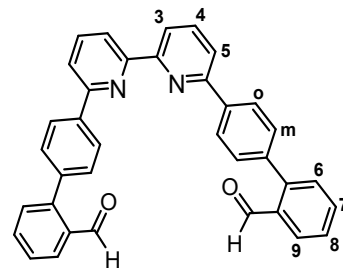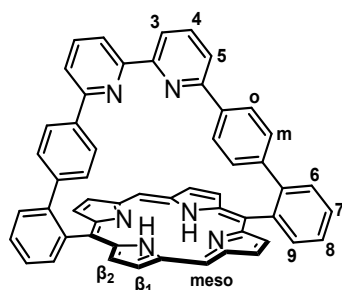

### Zinc(II)-templated synthesis of the bipyridine-strapped porphyrin

**2.** To a degassed solution of compound **3** (100 mg, 0.194 mmol) and Zn(OAc)<sub>2</sub>·2H<sub>2</sub>O (36 mg, 0.19 mmol) in CH<sub>2</sub>Cl<sub>2</sub> (stabilized with 0.2% EtOH; 700 mL), dipyrromethane (57 mg, 0.39 mmol) and then TFA (0.4 mL, 5 mmol) were added under argon atmosphere. The reaction mixture was stirred for 20 h at room temperature, then DDQ (365 mg, 1.61 mmol) was added and the solution was stirred for 4 h. NEt<sub>3</sub> (12 mL) was added and the solution was stirred for 20 min. The organic layer was washed with H<sub>2</sub>O (3 x 500 mL) and dried over Na<sub>2</sub>SO<sub>4</sub>. After removal of the solvent, the product was purified by SiO<sub>2</sub> column chromatography (CH<sub>2</sub>Cl<sub>2</sub>) and the collected red fraction were recrystallized from CH<sub>2</sub>Cl<sub>2</sub>/Et<sub>2</sub>O to yield porphyrin **2** (61 mg, 0.079 mmol, 41%). mp >300 °C (from CH<sub>2</sub>Cl<sub>2</sub>/Et<sub>2</sub>O). UV-visible (solvent) λ (nm (ε (M<sup>-1</sup>cm<sup>-1</sup>)): 284 (23000), sh 396 (2900), 413 (150000), sh 479 (2100), 506 (7500), 539 (2400), 579 (3000), sh 586 (3000), 635 (1300). <sup>1</sup>H NMR δH(400 MHz; CDCl<sub>3</sub>) 10.14 (2 H, s, H<sub>meso</sub>), 9.25 (4 H, d, J = 4.5, H<sub>β</sub>), 8.93 (4 H, d, J = 4.5, H<sub>β</sub>), 8.67 (2 H, dd, J = 7.2, 1.2 H<sub>9</sub>), 7.94–7.83 (6 H, m, H<sub>6,7,8</sub>), 7.48 (2 H, t, J = 7.8, H<sub>4</sub>), 7.31 (2 H, dd, J = 7.8, 0.9, H<sub>5</sub>), 7.12 (2 H, dd, J = 7.8, 0.9, H<sub>3</sub>), 6.78 (4 H, m, H<sub>0</sub>), 6.67 (4 H, m, H<sub>m</sub>), -3.15 (2 H, s, H<sub>N-H</sub>). <sup>13</sup>C NMR δC(126 MHz, CDCl<sub>3</sub>) 157.5, 157.3, 147.2, 145.3, 144.8, 141.6, 139.9, 136.8, 136.7, 134.6, 131.7, 130.5, 129.2, 128.8, 128.7, 126.3, 125.6, 120.6, 119.6, 117.2, 105.4. MALDI-TOF MS: *m/z* = 767.320 ([M+H]<sup>+</sup>, 100%).

### Lithium-templated synthesis of the bipyridine-strapped porphyrin 2.

To a degassed solution of compound **3** (100 mg, 0.194 mmol) and lithium trifluoromethanesulfonate (151 mg, 0.970 mmol) in CH<sub>2</sub>Cl<sub>2</sub> (stabilized with 0.2% EtOH; 700 mL), dipyrromethane (57 mg, 0.39 mmol) and TFA (0.4 mL, 5 mmol) were added under Ar. The solution was stirred for 20 h at room temperature, then DDQ (365 mg, 1.61 mmol) was added and the solution was stirred for 4 h. NEt<sub>3</sub> (12 mL) was added and the solution was stirred for 20 min. The organic layer was washed with H<sub>2</sub>O until the aqueous layer was pale yellow and dried over Na<sub>2</sub>SO<sub>4</sub>. After removal of the solvent, the product was purified by SiO<sub>2</sub> column chromatography (CH<sub>2</sub>Cl<sub>2</sub>) and the collected red fraction were recrystallized from CH<sub>2</sub>Cl<sub>2</sub>/Et<sub>2</sub>O to yield the porphyrin **2** (13 mg, 0.017 mmol, 9%).

### Attempted copper(I)-templated synthesis of the bipyridine-strapped porphyrin 2.

To a degassed solution of **3** (100 mg, 0.194 mmol) and Cu(MeCN)<sub>4</sub>BF<sub>4</sub> (31 mg, 0.097 mmol) in CH<sub>2</sub>Cl<sub>2</sub> (stabilized with 0.2% EtOH; 700 mL) dipyrromethane (57 mg, 0.39 mmol) and TFA (0.4 mL, 5 mmol) were added under Ar. The reaction mixture was stirred for 20 h at room temperature, then DDQ (365 mg, 1.61 mmol) was added and the solution was stirred for 4 h. NEt<sub>3</sub> (12 mL) was added and the solution

was stirred for 20 min. The organic layer was washed with H<sub>2</sub>O until the aqueous layer was pale yellow. The organic layer was then washed with a saturated aqueous solution of EDTA and an aqueous solution of KCN, and dried over Na<sub>2</sub>SO<sub>4</sub>. Purification by column chromatography over alumina (CH<sub>2</sub>Cl<sub>2</sub>) then over SiO<sub>2</sub> (CH<sub>2</sub>Cl<sub>2</sub>) gave a main red fraction that still contained numerous porphyrins (see Figure S17).

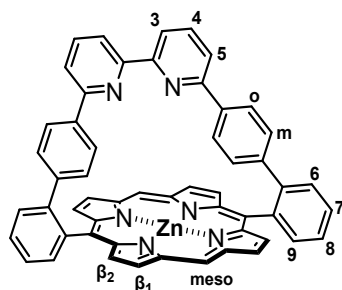

**Bipyridine-strapped Zn(II) porphyrin [2Zn].** A solution of strapped porphyrin **2** (61 mg, 0.080 mmol) and Zn(OAc)<sub>2</sub>·2H<sub>2</sub>O (175 mg, 0.795 mmol) in CHCl<sub>3</sub> (9 mL) and MeOH (1 mL) was refluxed for 14 h. The solution was cooled, then washed with water. The organic layer was dried over Na<sub>2</sub>SO<sub>4</sub> and solvent was removed under vacuum. The crude residue was purified by column chromatography (alumina, CH<sub>2</sub>Cl<sub>2</sub>) to yield a purple solid (54 mg, 0.065 mmol, 82%). The porphyrin could be recrystallized from CH<sub>2</sub>Cl<sub>2</sub>/pentane if necessary. Crystals of [2Zn] suitable for X-ray crystallography were grown from acetone/CH<sub>2</sub>Cl<sub>2</sub>. mp >300 °C (from CH<sub>2</sub>Cl<sub>2</sub>/pentane). UV-visible λ<sub>max</sub> (CH<sub>2</sub>Cl<sub>2</sub>)/nm (ε/dm<sup>3</sup>

mol<sup>-1</sup> cm<sup>-1</sup>): 290 (39000), sh 398 (26000), 419 (260000), 512 (1800), 547 (13000), 583 (1600). <sup>1</sup>H NMR (300 MHz, CDCl<sub>3</sub>) δ (ppm): 10.06 (s, 2H<sub>meso</sub>), 9.22 (d, *J* = 4.5 Hz, 4H, H<sub>β</sub>), 8.97 (d, *J* = 4.5 Hz, 4H, H<sub>β</sub>), 8.62 (dd, *J* = 7.4, 1.1 Hz, 2H, H<sub>9</sub>), 7.94-7.82 (m, 4H, H<sub>7,8</sub>), 7.78 (dd, *J* = 7.5, 1.5 Hz, 2H, H<sub>6</sub>), 7.45 (t, *J* = 7.8 Hz, 2H, H<sub>4</sub>), 7.23 (dd, *J* = 7.8 Hz, 0.9 Hz, 2H, H<sub>3</sub>), 7.10 (dd, *J* = 7.8 Hz, 0.9 Hz, 2H, H<sub>5</sub>), 6.75 (d, *J* = 8.5 Hz, 4H, H<sub>0</sub>), 6.62 (d, *J* = 8.5 Hz, 4H, H<sub>m</sub>). <sup>13</sup>C NMR (126 MHz, CDCl<sub>3</sub>) δ (ppm): 157.4, 157.0, 150.3, 149.4, 145.3, 142.8, 141.8, 137.0, 136.7, 134.0, 131.8, 129.4, 128.5, 128.4, 125.8, 125.6, 120.6, 120.1, 117.8, 106.1. MALDI-TOF MS: *m/z* = 829.331 ([M+H]<sup>+</sup>, 100%).

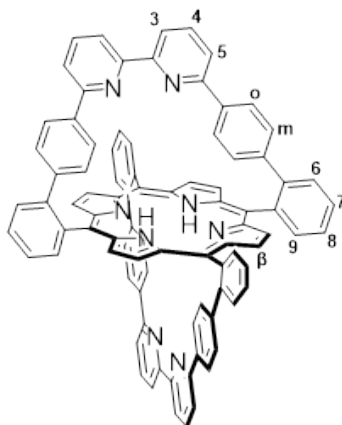

**Double bipyridine-strapped porphyrin 5.** To a degassed solution of compound **3** (250 mg, 0.484 mmol) and Zn(OAc)<sub>2</sub>·2H<sub>2</sub>O (106 mg, 0.484 mmol) in degassed CH<sub>2</sub>Cl<sub>2</sub> (1.75 L), freshly distilled pyrrole (67 μL, 0.97 mmol) and then 1 mL of TFA were added under argon atmosphere. The reaction mixture was stirred for 20 h at room temperature, then DDQ (1.1 g, 4.8 mmol) was added and the solution was stirred for 4 h. NEt<sub>3</sub> (30 mL) was added and the solution was stirred for 20 min. The organic layer was washed with H<sub>2</sub>O (3 x 1.5 L) and dried over Na<sub>2</sub>SO<sub>4</sub>. After removal of the solvent, the product was purified by SiO<sub>2</sub> column chromatography (gradient of CH<sub>2</sub>Cl<sub>2</sub> to CH<sub>2</sub>Cl<sub>2</sub>/MeOH: 9/1). The first red fraction was recrystallized from CH<sub>2</sub>Cl<sub>2</sub>/MeOH to yield compound **5** (20 mg, 0.016 mmol, 7%). mp (from CH<sub>2</sub>Cl<sub>2</sub>/MeOH). UV-visible λ<sub>max</sub> (CH<sub>2</sub>Cl<sub>2</sub>)/nm (ε/dm<sup>3</sup> mol<sup>-1</sup> cm<sup>-1</sup>): 287 (92000), sh 412 (56000), 430 (305000), 491 (3600), 524 (16000), 559 (6200), 599 (5400), 656

(2800). <sup>1</sup>H NMR δH(500 MHz; CDCl<sub>3</sub>) 8.72 (4 H, d, *J* = 7.3, H<sub>9</sub>), 8.57 (8 H, s, H<sub>β</sub>), 7.81 (4 H, dt, *J* = 7.4, 1.4, H<sub>7</sub>), 7.73 (8 H, m, H<sub>6,8</sub>), 7.52 (4 H, t, *J* = 7.8, H<sub>4</sub>), 7.36 (4 H, d, *J* = 7.8, H<sub>5</sub>), 7.21 (4 H, d, *J* = 7.8, H<sub>3</sub>), 6.92 (8 H, d, *J* = 8.5, H<sub>0</sub>), 6.73 (8 H, d, *J* = 8.5, H<sub>m</sub>), -2.65 (2 H, s, H<sub>N-H</sub>). <sup>13</sup>C NMR δC(126 MHz, CDCl<sub>3</sub>) 157.9, 157.5, 144.4, 142.0, 140.8, 140.7, 136.9, 135.3, 129.2, 129.0, 128.4, 126.7, 125.4, 120.6, 119.8, 118.1. ESI-HR MS: *m/z* 1223.4525 ([M+H]<sup>+</sup>, 100%), 612.2315 ([M+2H]<sup>2+</sup>, 20%).

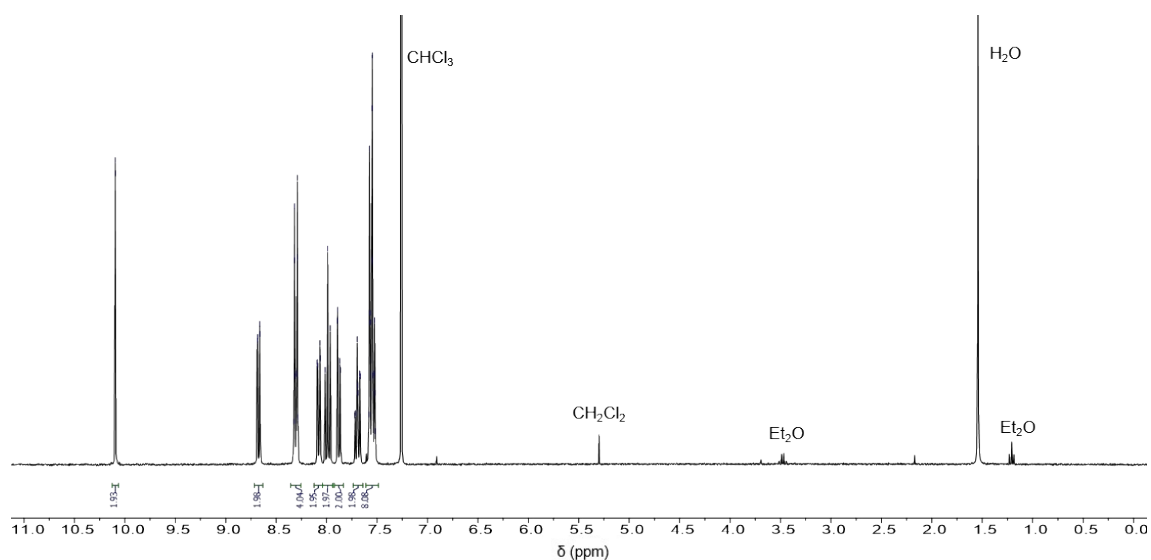

**Figure S1.**  $^1\text{H}$  NMR spectrum (300 MHz,  $\text{CDCl}_3$ ) of compound **3** (recrystallized from  $\text{CH}_2\text{Cl}_2/\text{Et}_2\text{O}$  and dried under vacuum for 5 days).

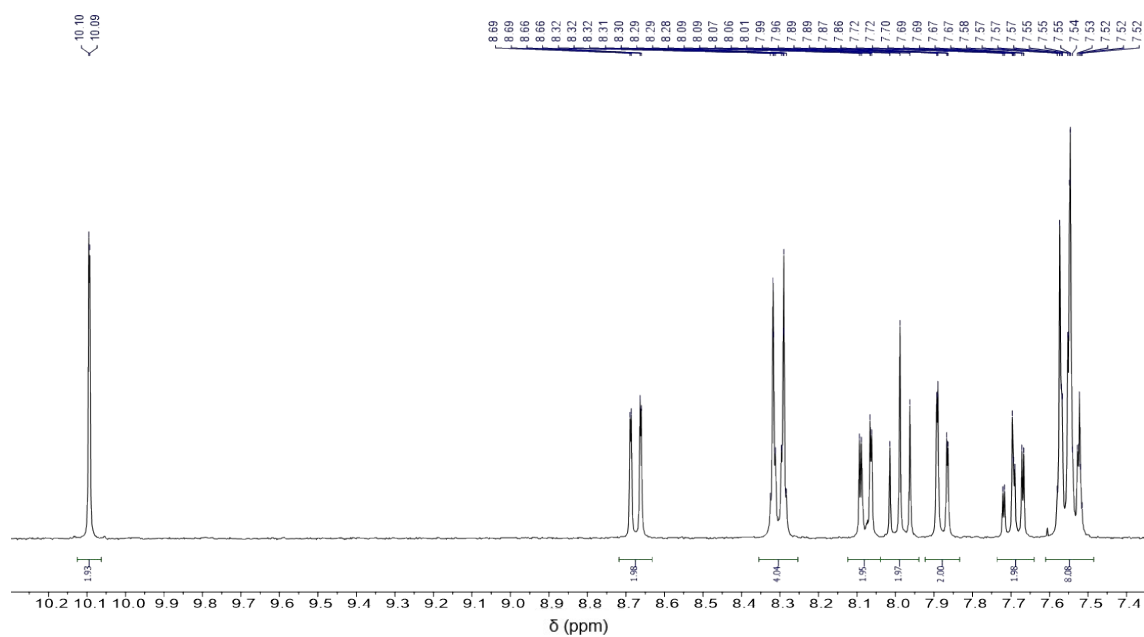

**Figure S2.** Aromatic region of the  $^1\text{H}$  NMR spectrum (300 MHz,  $\text{CDCl}_3$ ) of compound **3** (recrystallized from  $\text{CH}_2\text{Cl}_2/\text{Et}_2\text{O}$  and dried under vacuum for 5 days).

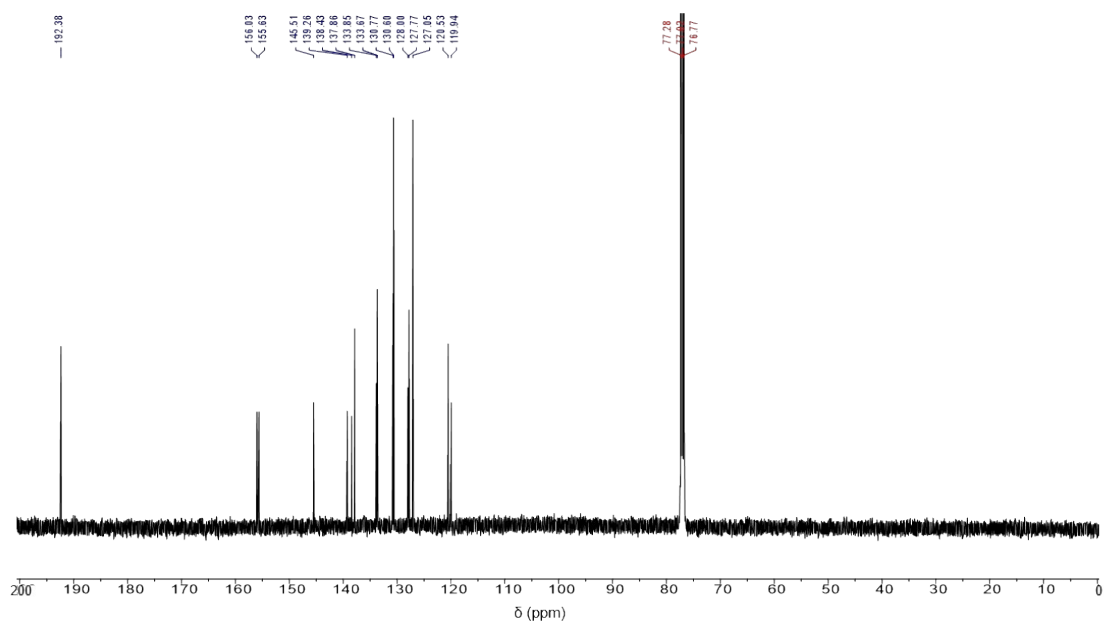

**Figure S3.**  $^{13}\text{C}$  NMR spectrum (126 MHz,  $\text{CDCl}_3$ ) of compound **3**.

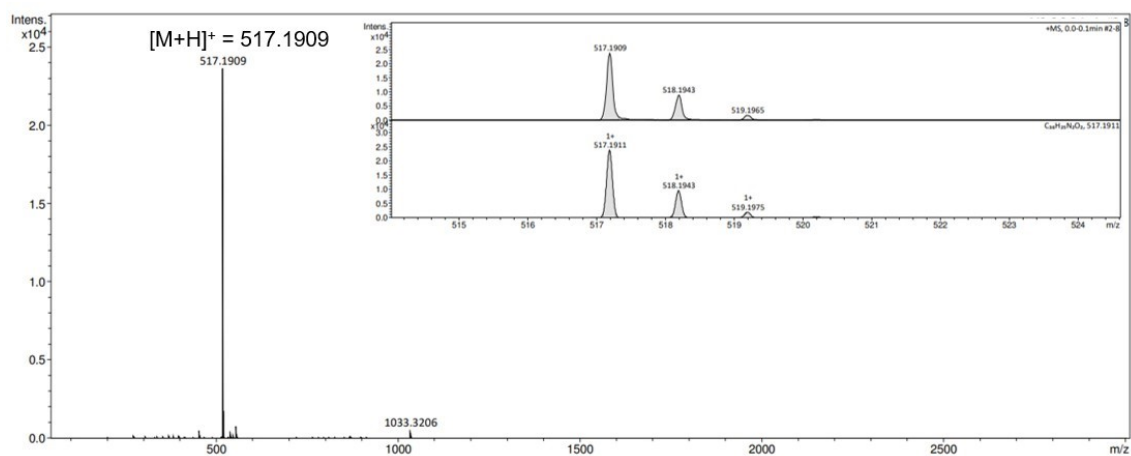

**Figure S4.** ESI HRMS spectrum of compound **3**.

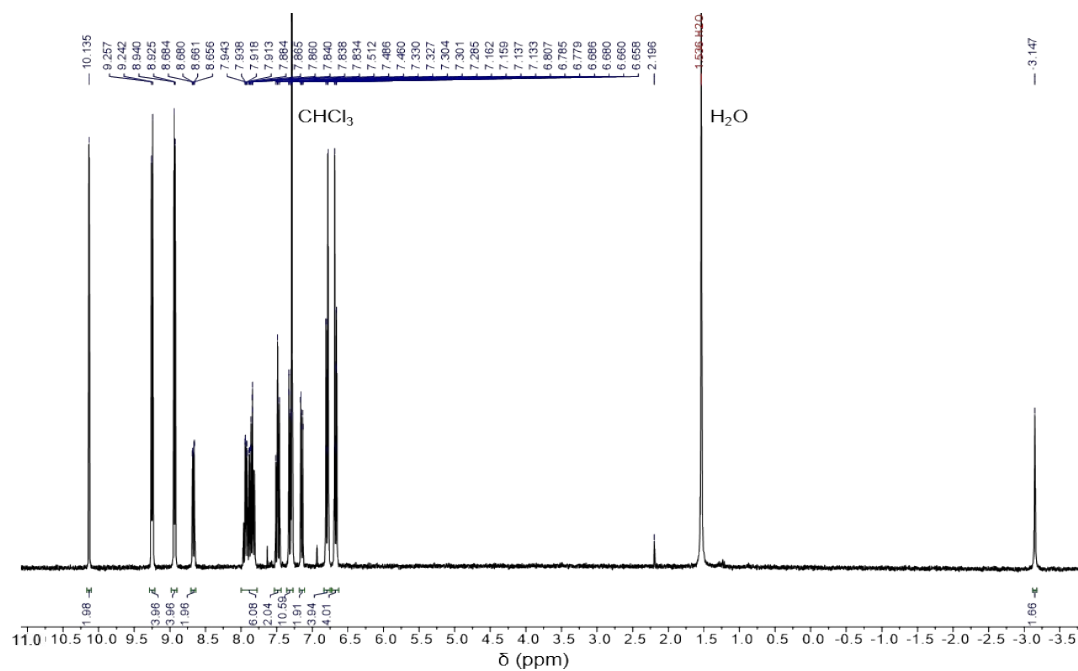

**Figure S5.**  $^1\text{H}$  NMR spectrum (300 MHz,  $\text{CDCl}_3$ ) of compound **2**.

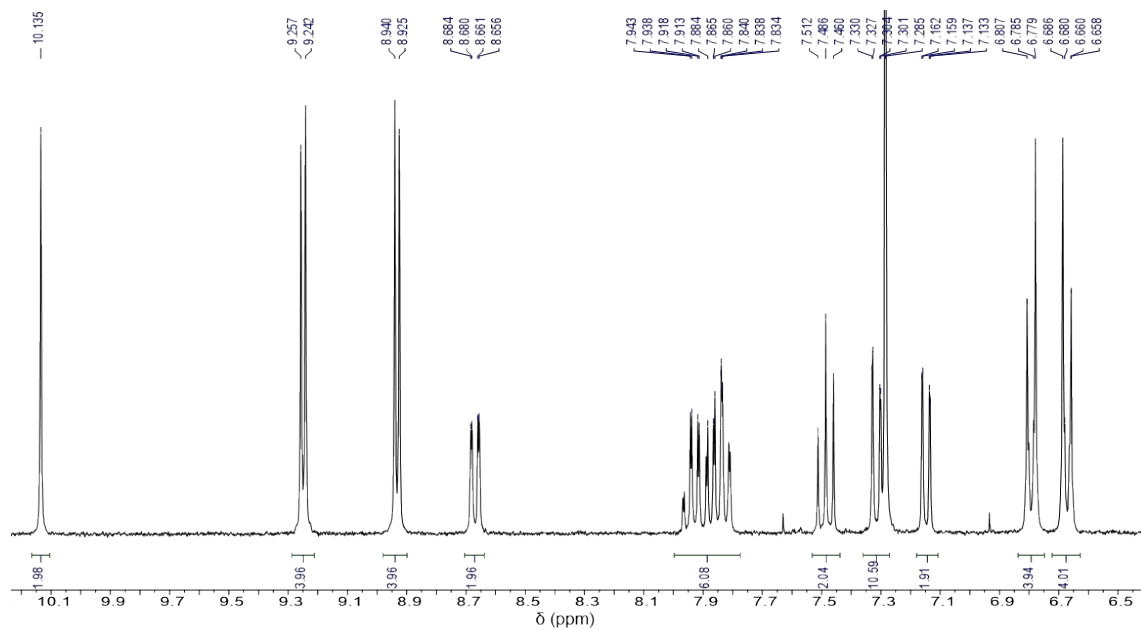

**Figure S6.** Aromatic region of the  $^1\text{H}$  NMR spectrum (300 MHz,  $\text{CDCl}_3$ ) of compound **2**.

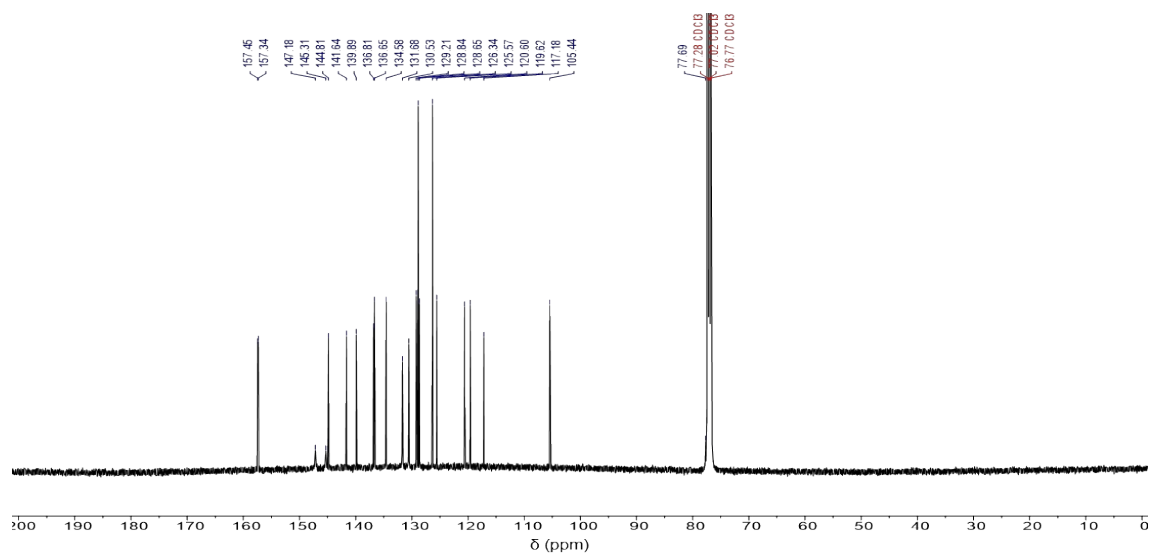

**Figure S7.**  $^{13}\text{C}$  NMR spectrum (126 MHz,  $\text{CDCl}_3$ ) of compound **2**.

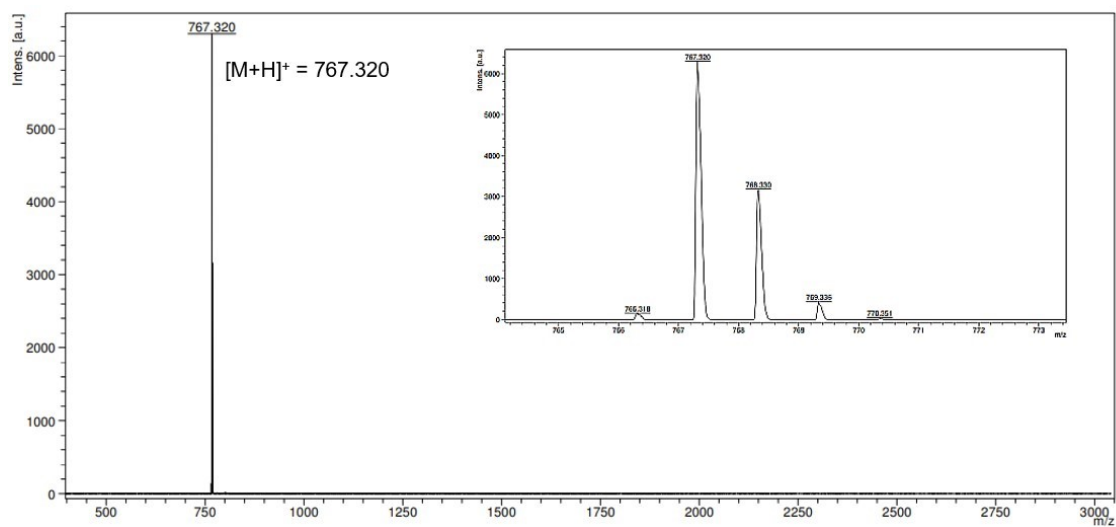

**Figure S8.** MALDI-TOF MS spectrum of compound **2**.

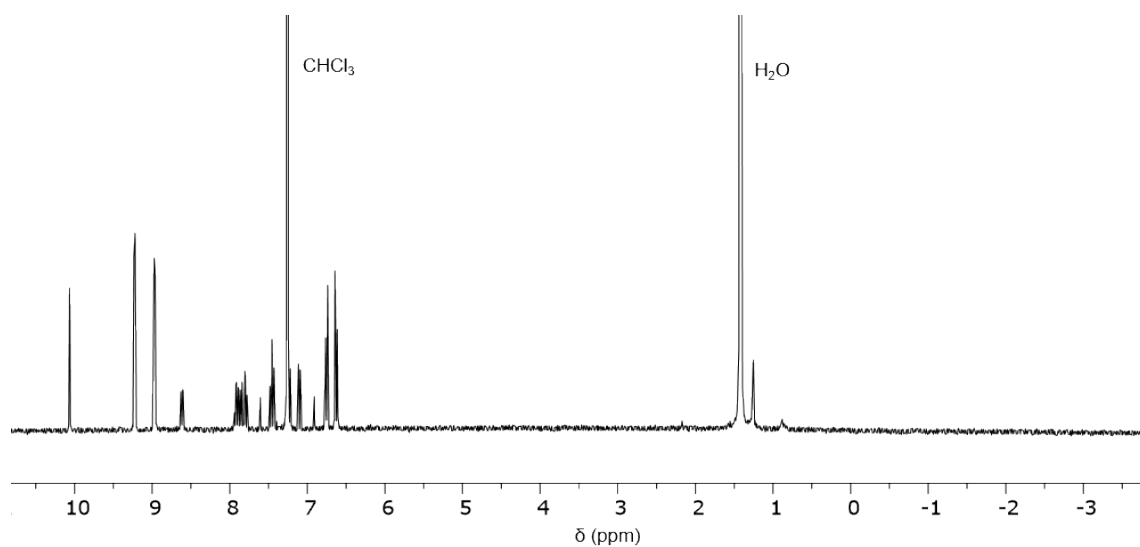

**Figure S9.**  $^1\text{H}$  NMR spectrum (300 MHz,  $\text{CDCl}_3$ ) of compound **[2Zn]**.

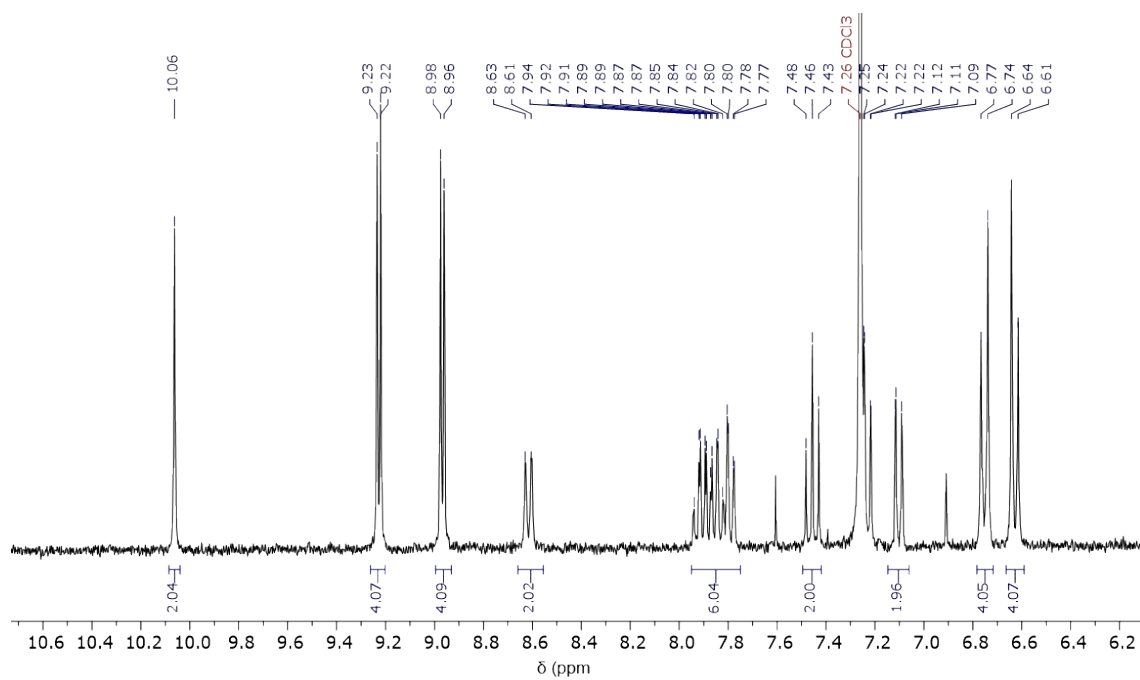

**Figure S10.**  $^1\text{H}$  NMR spectrum (300 MHz,  $\text{CDCl}_3$ ) of compound **[2Zn]** (aromatic region).

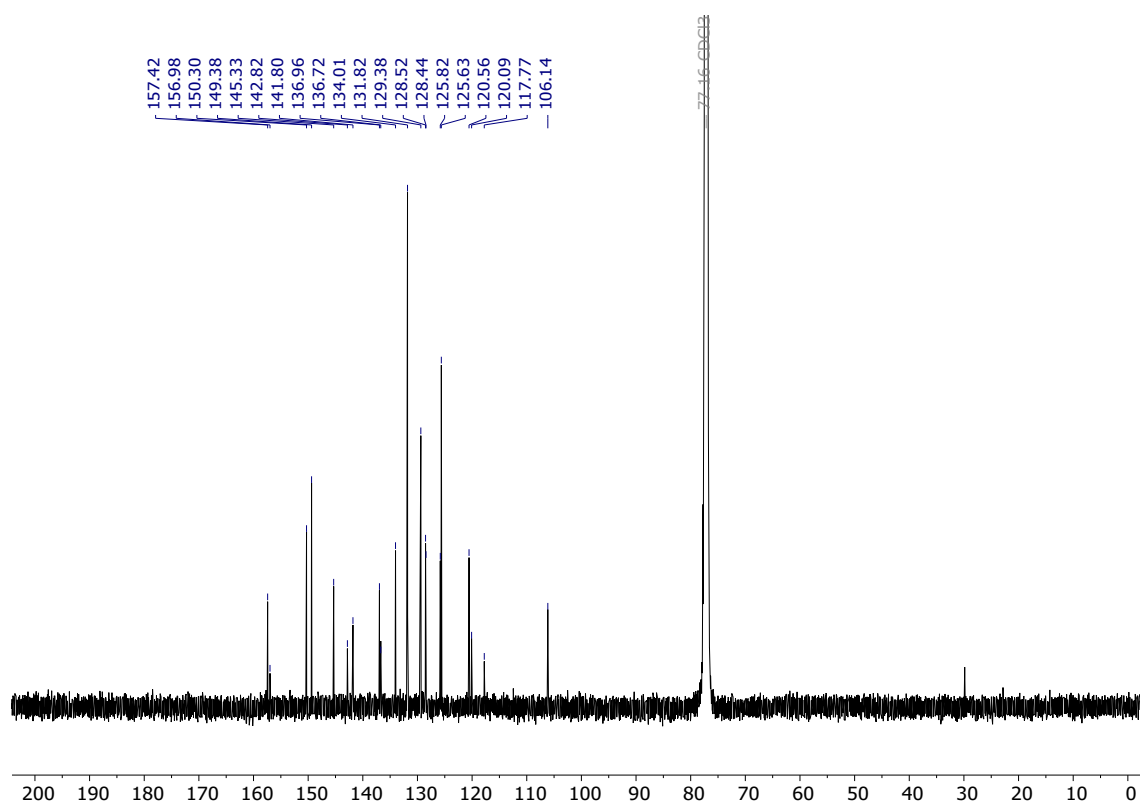

**Figure S11.**  $^{13}\text{C}$  NMR spectrum (126 MHz,  $\text{CDCl}_3$ ) of compound **[2Zn]**

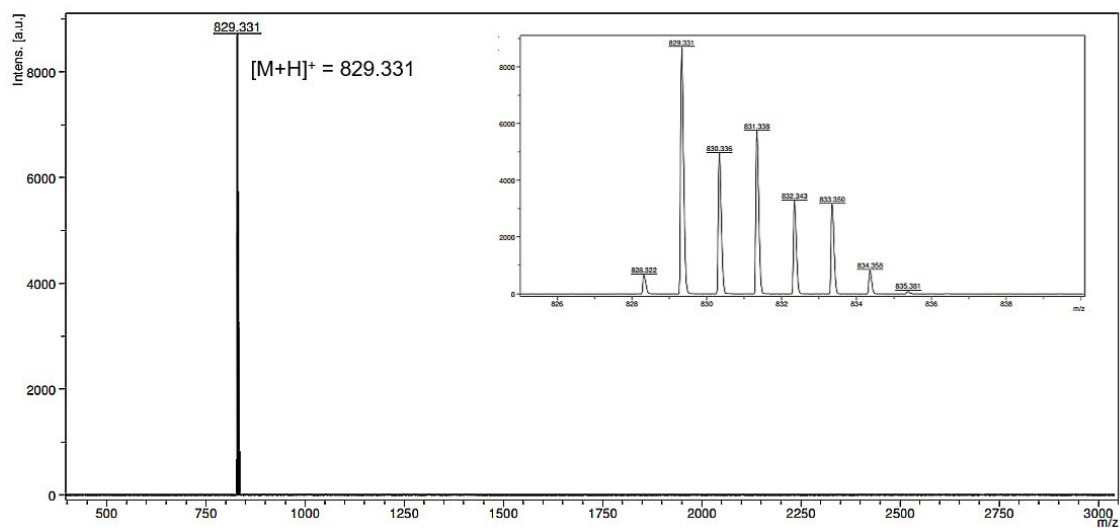

**Figure S12.** MALDI-TOF MS spectrum of compound **[2Zn]**.

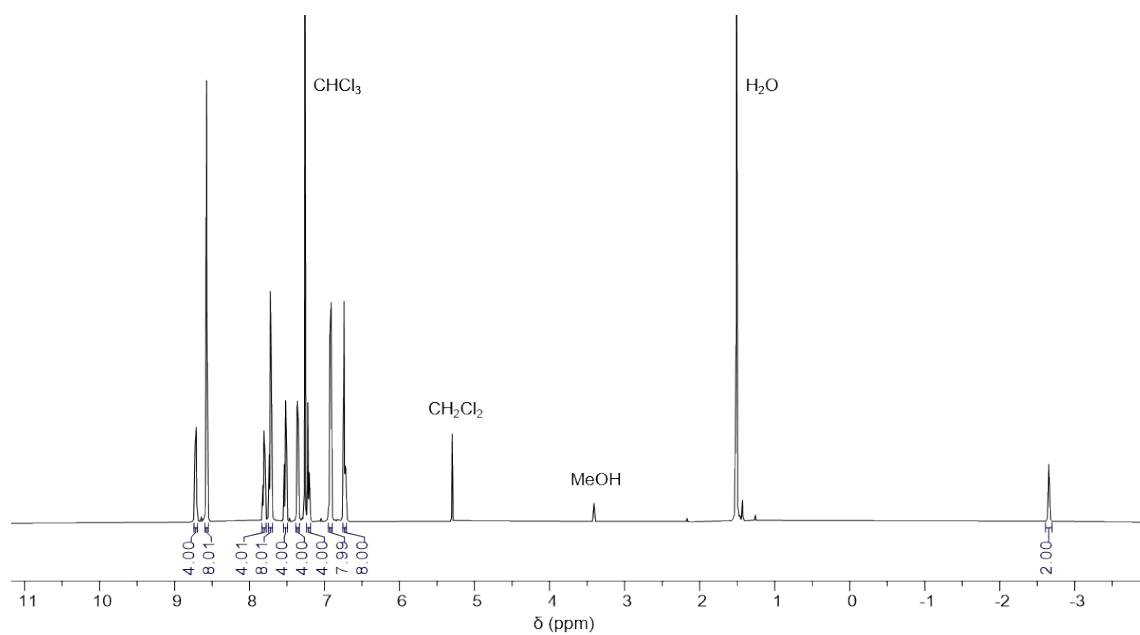

**Figure S13.**  $^1\text{H}$  NMR spectrum (500 MHz,  $\text{CDCl}_3$ ) of compound **5**.

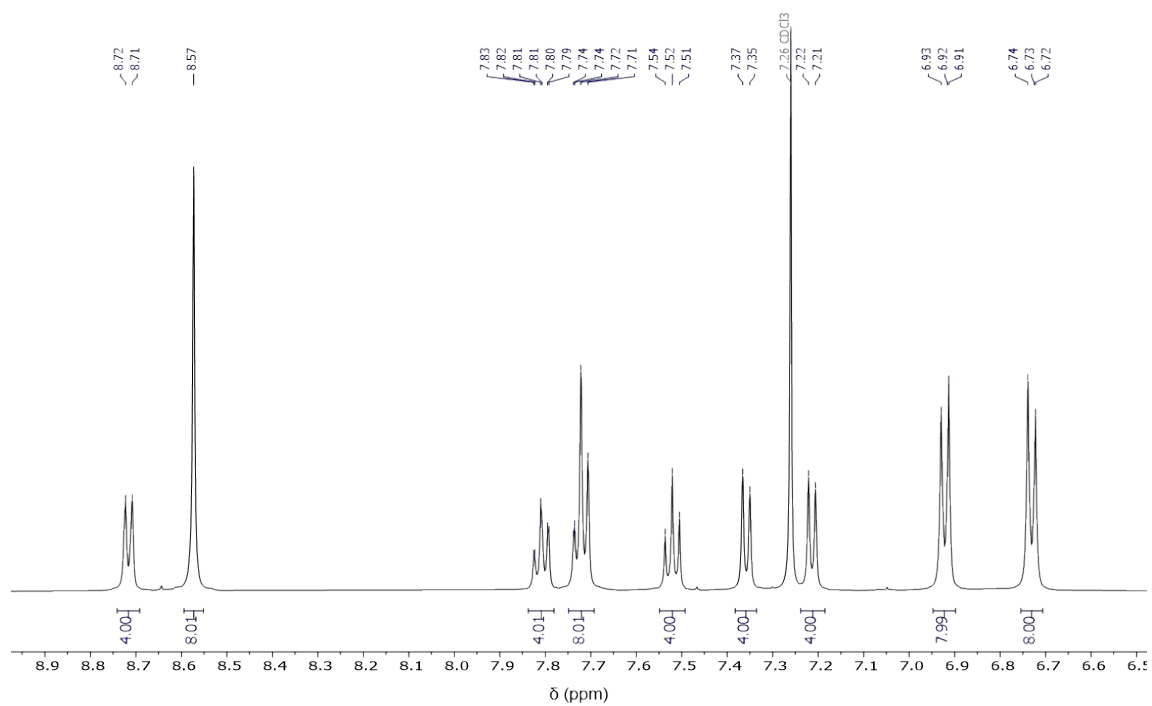

**Figure S14.** Aromatic region  $^1\text{H}$  NMR spectrum (500 MHz,  $\text{CDCl}_3$ ) of compound **5**.

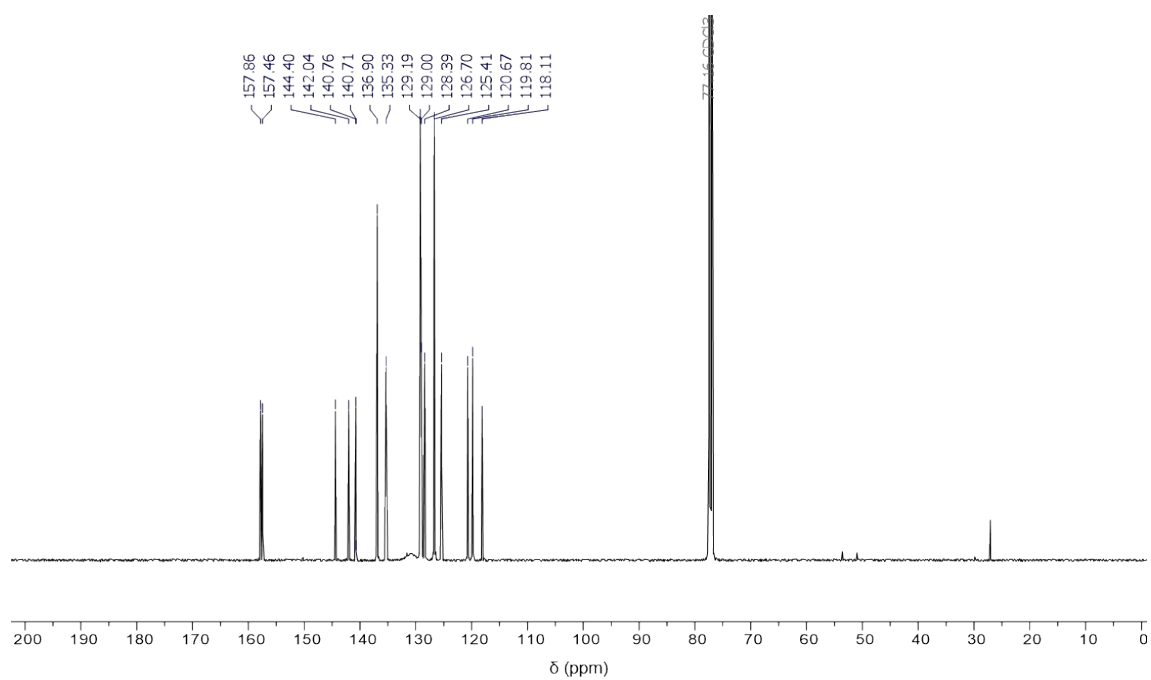

**Figure S15.**  $^{13}\text{C}$  NMR spectrum (126 MHz,  $\text{CDCl}_3$ ) of compound **5**.

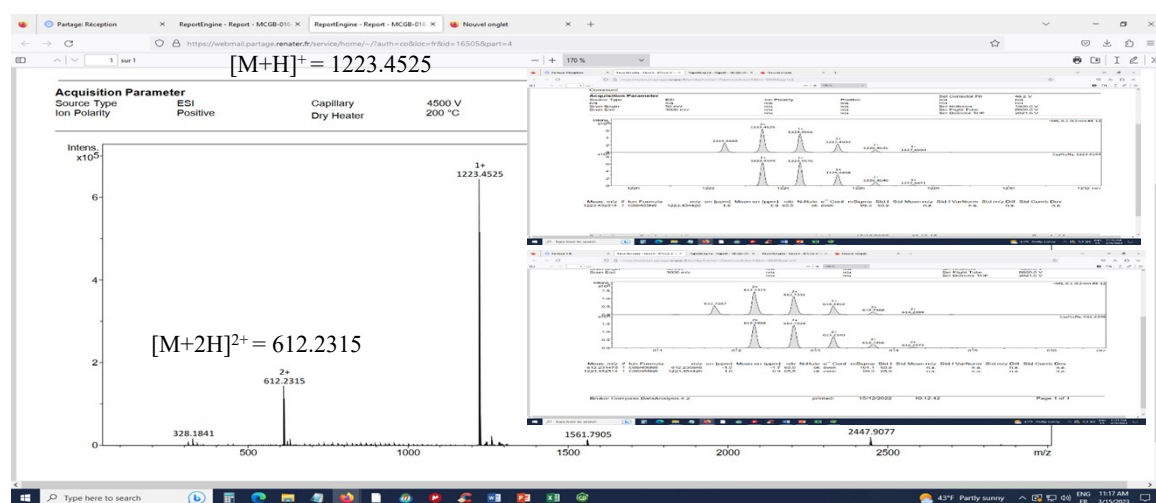

**Figure S16.** ESI HRMS spectrum of compound **5**.

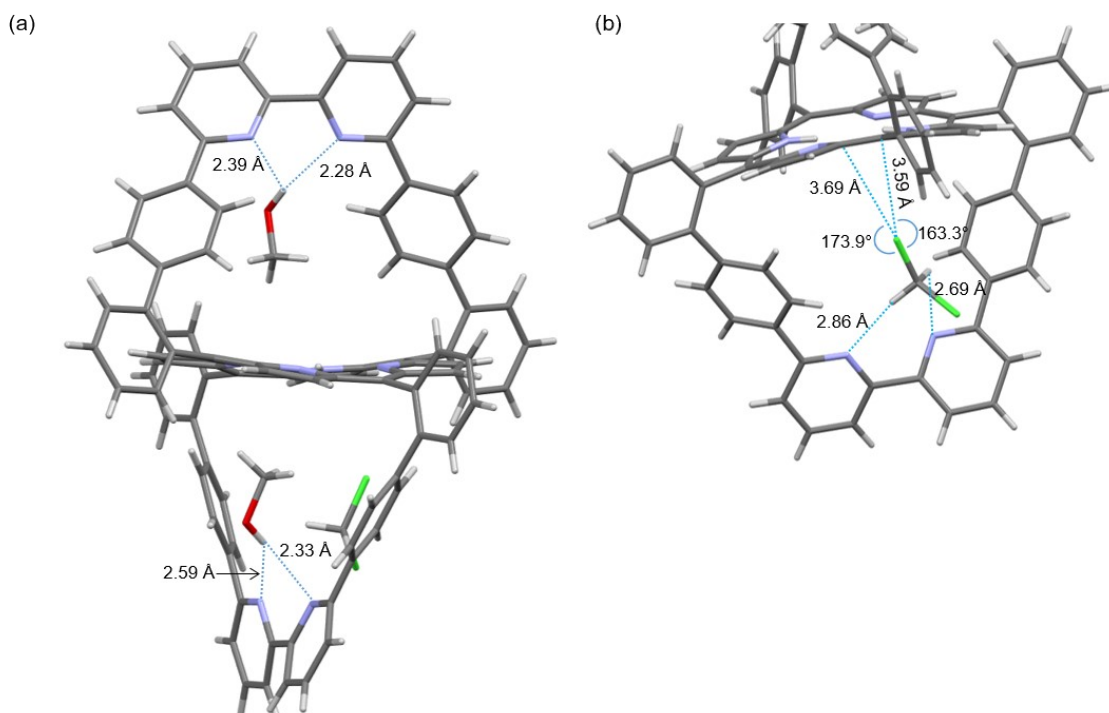

**Figure S17.** Relevant distances and angles of solvent molecules observed within the strap of **5** in its crystal structure. (a) Distances between the hydroxyl protons of methanol and the nitrogen atoms of the bipyridine strap of **5**. (b) Distances and angles between the  $\text{CH}_2\text{Cl}_2$  molecule and porphyrin **5**. The MeOH molecule was omitted for sake of clarity.

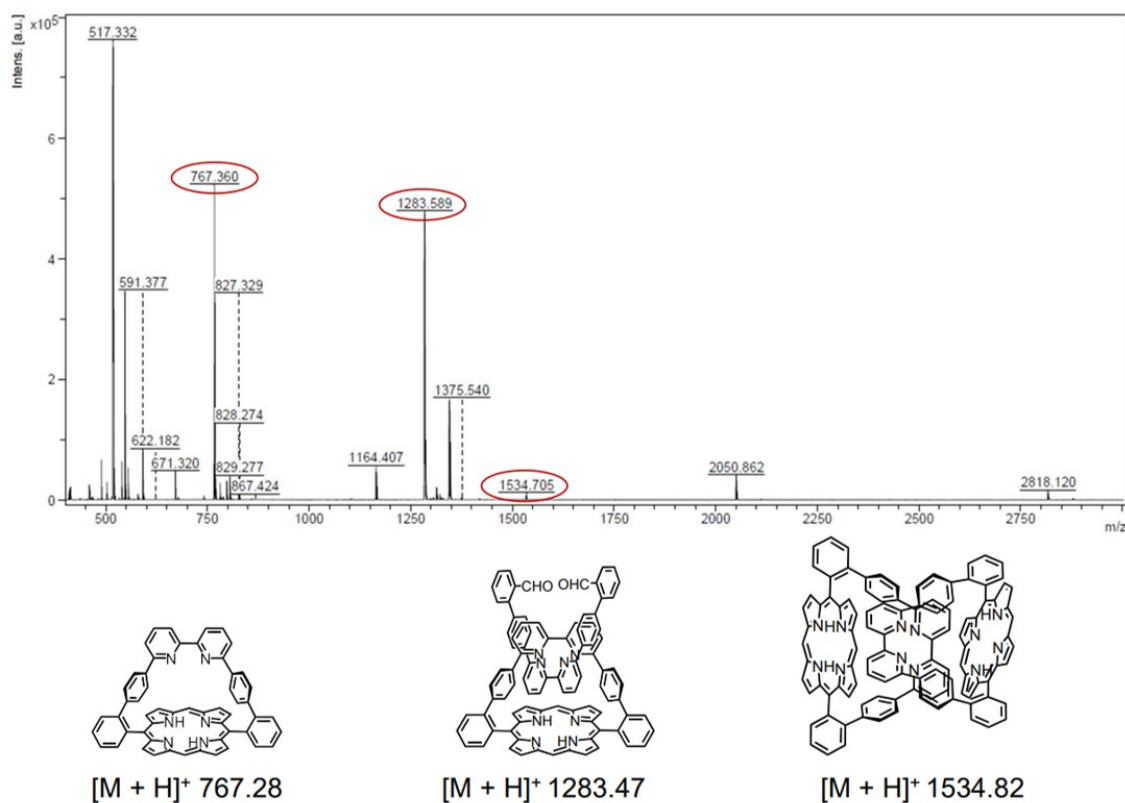

**Figure S18.** MALDI-TOF mass spectrum of the crude product of the attempted copper-templated synthesis of **2**.

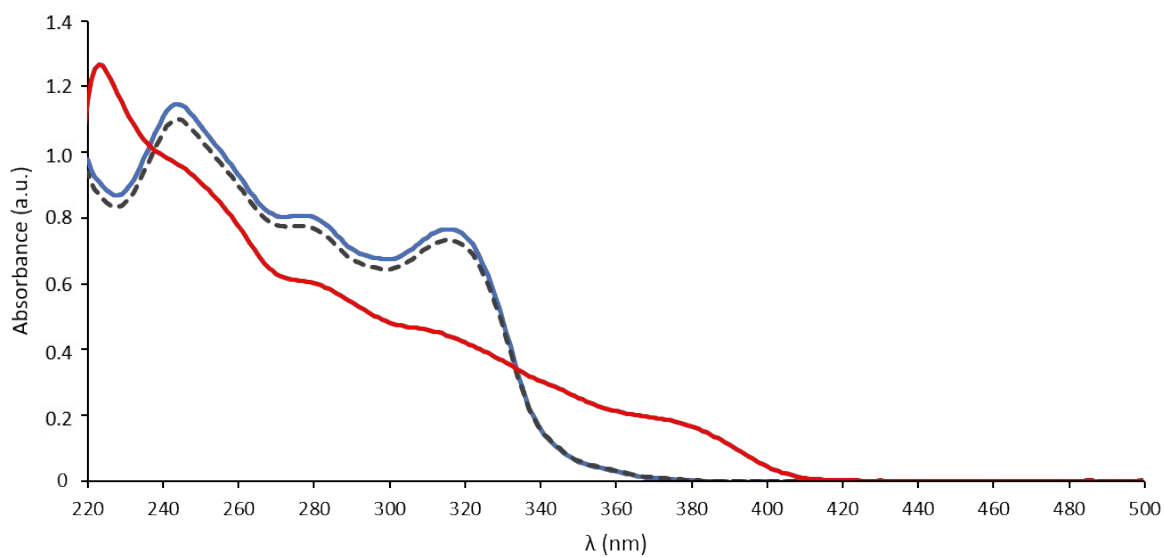

**Figure S19.** UV-vis spectra of **3** (blue line, 0.1 mM, CH<sub>2</sub>Cl<sub>2</sub>) after addition of 1 eq of Zn(OAc)<sub>2</sub>·2H<sub>2</sub>O (dotted black line) and after addition of 1 eq of Zn(OAc)<sub>2</sub>·2H<sub>2</sub>O and an excess of TFA (red line).

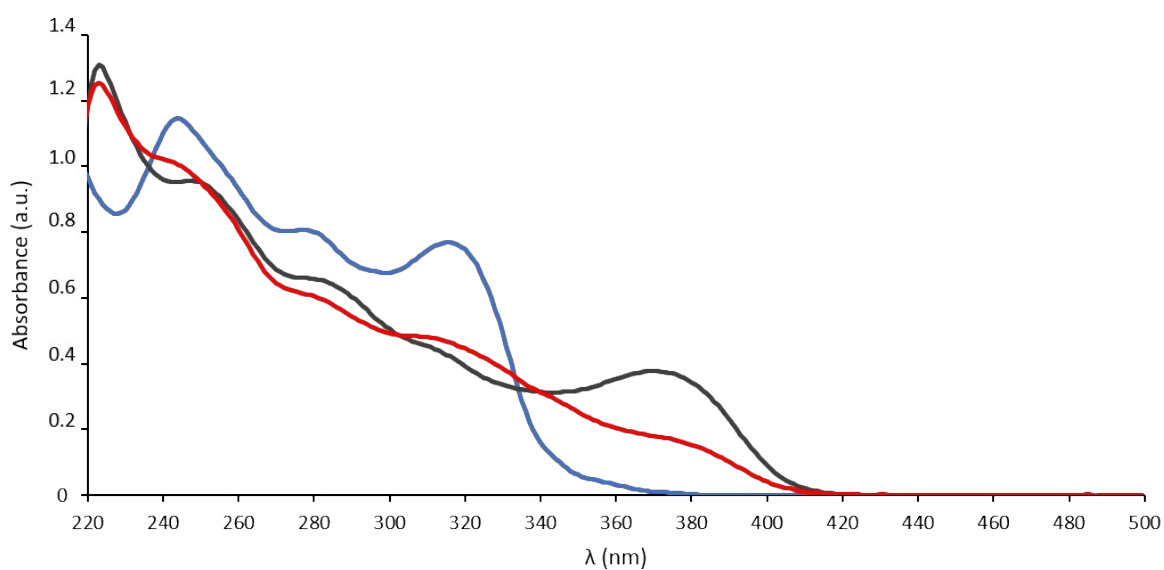

**Figure S20.** UV-vis spectra of **3** (blue line, 0.1 mM, CH<sub>2</sub>Cl<sub>2</sub>) after addition of excess TFA (black line) and after the addition of 1 eq of Zn(OAc)<sub>2</sub>·2H<sub>2</sub>O and an excess of TFA (red line).

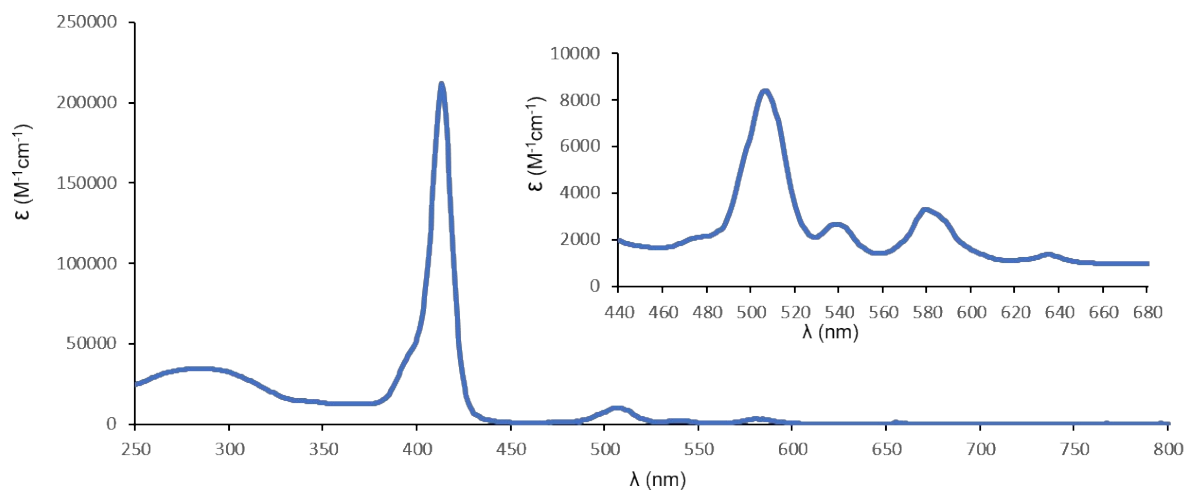

**Figure S21.** UV-visible spectrum of **2** in  $\text{CH}_2\text{Cl}_2$ .

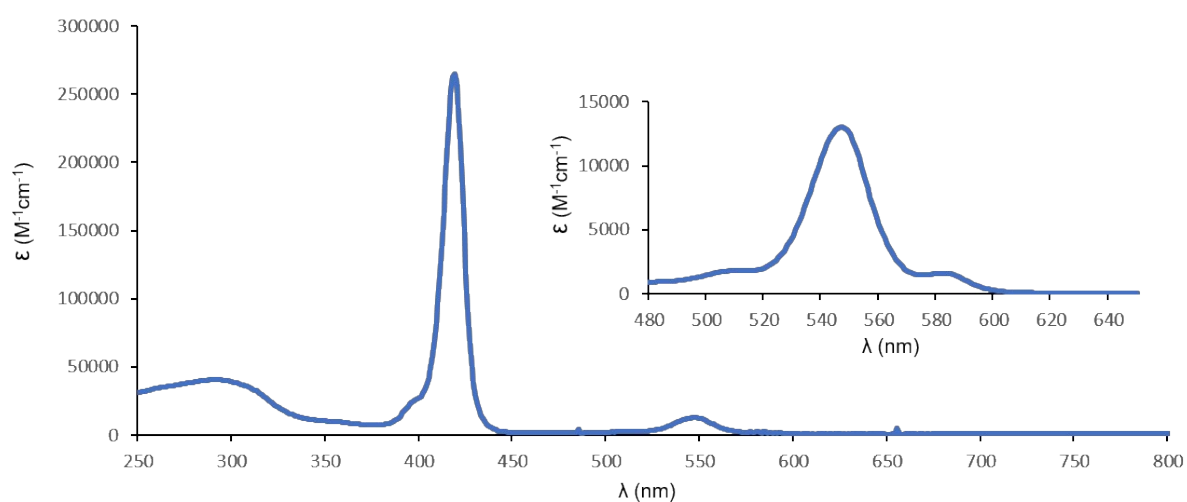

**Figure S22.** UV-visible spectrum of **[2Zn]** in  $\text{CH}_2\text{Cl}_2$ .

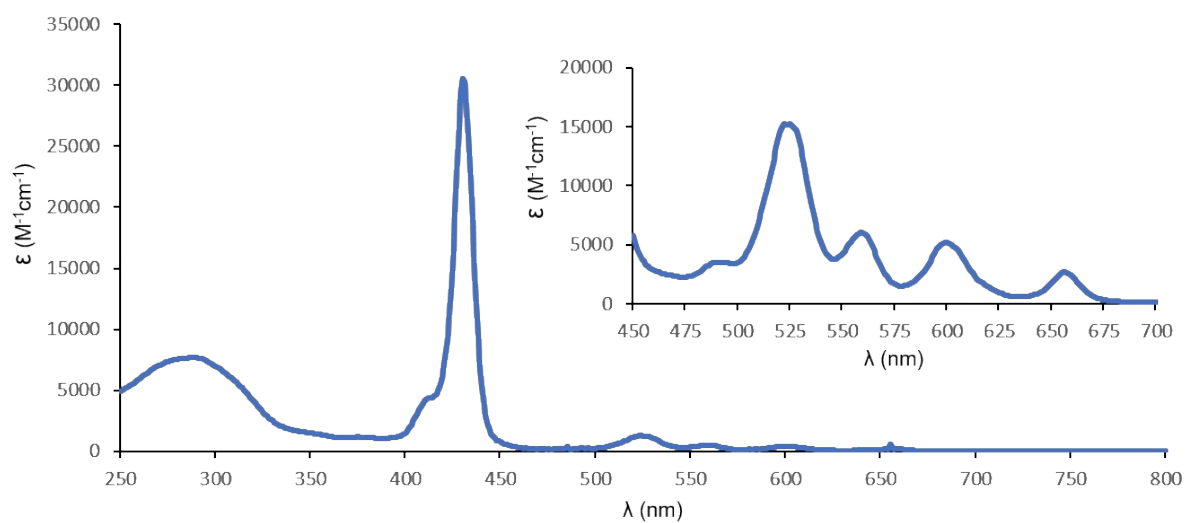

**Figure S23.** UV-visible spectrum of **5** in  $\text{CH}_2\text{Cl}_2$ .

**Table S1.** Comparison of UV-visible data of bipyridine-strapped porphyrins **2**, **5** and [**2Zn**] with those of the phenanthroline-strapped porphyrins **1** and [**1Zn**]. All spectra recorded in CH<sub>2</sub>Cl<sub>2</sub>.

| compound |          | λ (nm) |     |                     |     |     |     |                     |     | reference |
|----------|----------|--------|-----|---------------------|-----|-----|-----|---------------------|-----|-----------|
| 1        | 284      |        | 412 | sh 479 <sup>a</sup> | 506 | 540 | 580 | sh 586 <sup>a</sup> | 635 | S8        |
| 2        | 284      | sh 396 | 413 | sh 479              | 506 | 539 | 579 | sh 586              | 635 |           |
| 5        | 287      | sh 412 | 430 | 491                 | 524 | 559 | 599 |                     | 656 |           |
| [1Zn]    | 284, 308 |        | 418 |                     | 546 | 578 |     |                     |     | S9        |
| [2Zn]    | 290      | sh 298 | 419 | 512                 | 547 | 583 |     |                     |     |           |

<sup>a</sup> Not reported in the literature reference but observed in the spectrum.

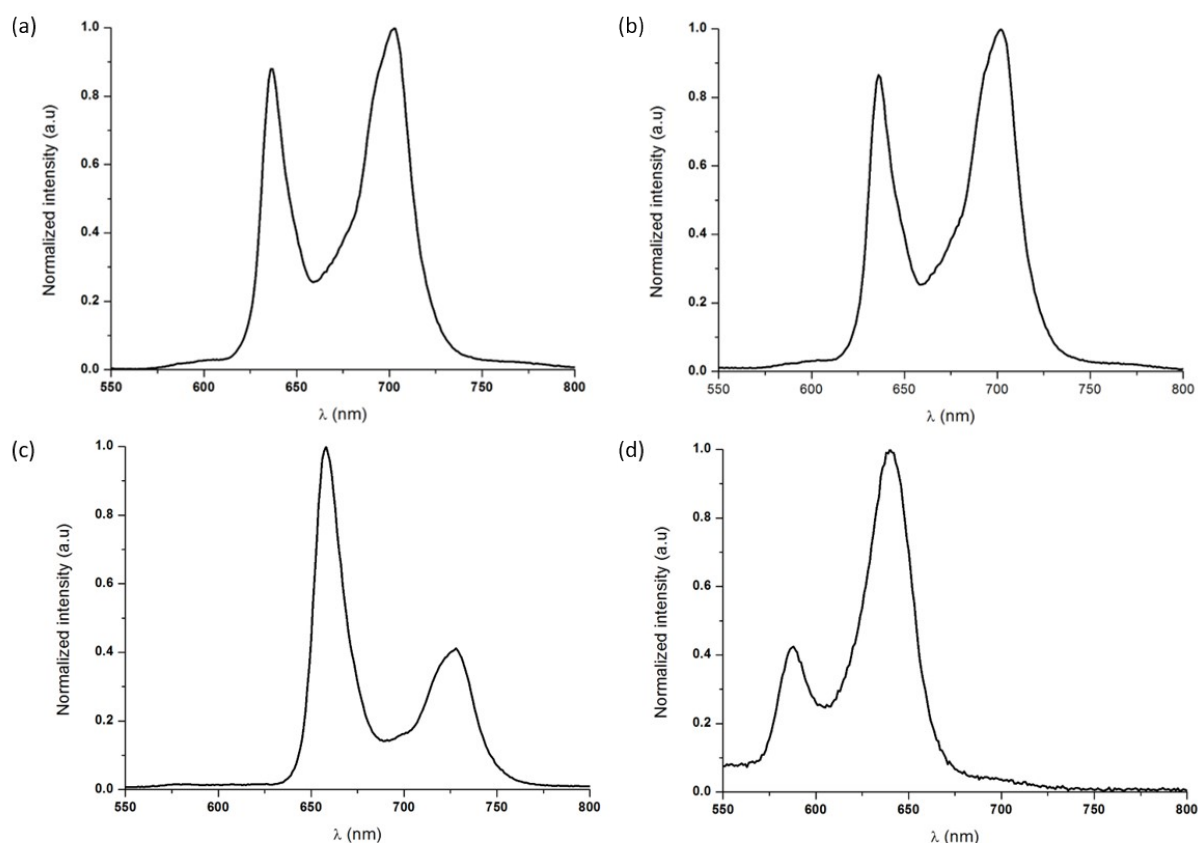

**Figure S24.** Emission spectra in CH<sub>2</sub>Cl<sub>2</sub> + 0.01% of 2,6-lutidine (to prevent photoprotonation<sup>S10</sup>). (a) **1** ( $\lambda_{\text{ex}}$  = 506 nm), (b) **2** ( $\lambda_{\text{ex}}$  = 506 nm), (c) **5** ( $\lambda_{\text{ex}}$  = 524 nm) and (d) [**2Zn**] ( $\lambda_{\text{ex}}$  = 512 nm).

**Table S2.** Comparison of emission wavelengths of **1**, **2**, **5**, [**1Zn**] and [**2Zn**] in CH<sub>2</sub>Cl<sub>2</sub> + 0.01% 2,6-lutidine.

| compound       | $\lambda_{\text{em}}$ (nm) |     | $\lambda_{\text{ex}}$ (nm) | reference |
|----------------|----------------------------|-----|----------------------------|-----------|
| <b>1</b>       | 636                        | 703 | 506                        |           |
| <b>2</b>       | 636                        | 702 | 506                        |           |
| <b>5</b>       | 658                        | 728 | 524                        |           |
| [ <b>1Zn</b> ] | 595                        | 646 | 556                        | S10       |
| [ <b>2Zn</b> ] | 588                        | 640 | 512                        |           |

<sup>S8</sup> J. A. Wytko, E. Graf and J. Weiss, *J. Org. Chem.* 1992, **57**, 1015.

<sup>S9</sup> P. Ochsenbein, M. Bonin, K. Schenk, J. Froidevaux, J. Wytko, E. Graf and J. Weiss *Eur. J. Inorg. Chem.* 1999, **7**, 1175.

<sup>S10</sup> D. Paul, J. A. Wytko, M. Koepf, J. Weiss, *Inorg. Chem.* 2002, **41**, 3699.
